CORRECTION

# Correction: Pelvic Belt Effects on Health Outcomes and Functional Parameters of Patients with Sacroiliac Joint Pain

Niels Hammer, Robert Möbius, Stefan Schleifenbaum, Karl-Heinz Hammer, Stefan Klima, Justin S. Lange, Odette Soisson, Dirk Winkler, Thomas L. Milani

[Table 2](#) is a duplicate of Table 3. Please view the correct [Table 2](#) here.

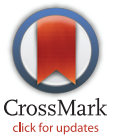

 OPEN ACCESS

**Citation:** Hammer N, Möbius R, Schleifenbaum S, Hammer K-H, Klima S, Lange JS, et al. (2015) Correction: Pelvic Belt Effects on Health Outcomes and Functional Parameters of Patients with Sacroiliac Joint Pain. PLoS ONE 10(10): e0140090. doi:10.1371/journal.pone.0140090

**Published:** October 2, 2015

**Copyright:** © 2015 Hammer et al. This is an open access article distributed under the terms of the [Creative Commons Attribution License](#), which permits unrestricted use, distribution, and reproduction in any medium, provided the original author and source are credited.

**Table 2. Short Form 36 (SF36) transformed scores of patients with sacroiliac joint (SIJ) pain prior to pelvic belt application (pre) and in a six-weeks follow up with pelvic belt application (post).** Mean values  $\pm$  standard deviations are given.

| SF36 scores                | SIJ patients pre (n = 17) | SIJ patients post (n = 15) | p            |
|----------------------------|---------------------------|----------------------------|--------------|
| Physical functioning       | 56.2 $\pm$ 17.5           | 73.2 $\pm$ 17.5            | <b>0.002</b> |
| Role functioning physical  | 63.2 $\pm$ 26.4           | 68.8 $\pm$ 26.5            | 0.110        |
| Bodily pain                | 39.0 $\pm$ 21.0           | 50.7 $\pm$ 21.5            | <b>0.006</b> |
| General health             | 58.8 $\pm$ 16.3           | 55.4 $\pm$ 14.1            | 0.283        |
| Vitality                   | 50.0 $\pm$ 13.7           | 51.3 $\pm$ 12.8            | 0.551        |
| Social functioning         | 69.9 $\pm$ 26.2           | 72.5 $\pm$ 26.4            | 0.353        |
| Role functioning emotional | 78.1 $\pm$ 31.9           | 77.8 $\pm$ 26.7            | 0.663        |
| Mental health              | 66.3 $\pm$ 16.8           | 68.0 $\pm$ 15.3            | 0.435        |
| Physical summary           | 37.1 $\pm$ 5.9            | 41.7 $\pm$ 8.4             | <b>0.013</b> |
| Mental summary             | 50.5 $\pm$ 9.7            | 48.3 $\pm$ 9.6             | 0.345        |

doi:10.1371/journal.pone.0140090.t001

## Reference

1. Hammer N, Möbius R, Schleifenbaum S, Hammer K-H, Klima S, Lange JS, et al. (2015) Pelvic Belt Effects on Health Outcomes and Functional Parameters of Patients with Sacroiliac Joint Pain. PLoS ONE 10(8): e0136375. doi:[10.1371/journal.pone.0136375](https://doi.org/10.1371/journal.pone.0136375) PMID: [26305790](https://pubmed.ncbi.nlm.nih.gov/26305790/)
